# Supplementary material
Source: Springer Nature journal article supplement (https://www.springermedizin.de/resource/supplementary/12877_2010_570_MOESM1_ESM.pdf/9439496)
Supplement: MOESM1 [file 9439496]

## RECRUITMENT OF PARTICIPANTS

n=978 eligible elderly persons were identified

Of whom

n=21 had died

n= 65 had an invalid address

Leaving

n=892 who were invited to participate

## DROP OUT

n=66 gave a reason for declining participation

while

n=278 did not leave any reason

## STUDY SAMPLE

n=548 returned their questionnaires
